# Supplementary material for: Precursor Phenomena of Barium Titanate Single Crystals Grown Using a Solid-State Single Crystal Growth Method Studied with Inelastic Brillouin Light Scattering and Birefringence Measurements
Source: Molecules. 2018 Dec 1;23(12):3171. doi: 10.3390/molecules23123171 (PMC6321232; doi:10.3390/molecules23123171)
Supplement: Supplementary file 1 [file molecules-23-03171-s001.pdf]

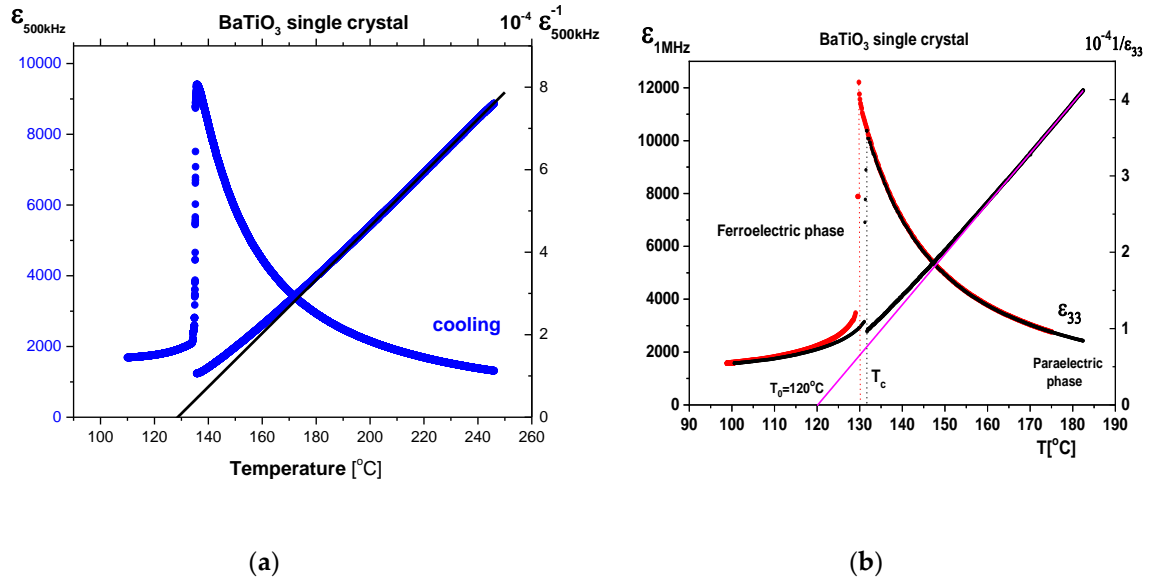

**Figure S1.** Temperature dependence of the real part of the complex permittivity and its inverse shown on the left and right ordinate, respectively, of the (a) SSCG-grown and (b) TSSG-grown BaTiO<sub>3</sub> single crystals. The solid line is the best-fitted result for the inverse dielectric constant in the paraelectric phase obtained by using the Curie–Weiss law. The data of TSSG-grown BaTiO<sub>3</sub> were the modified one reported in Reference 18.

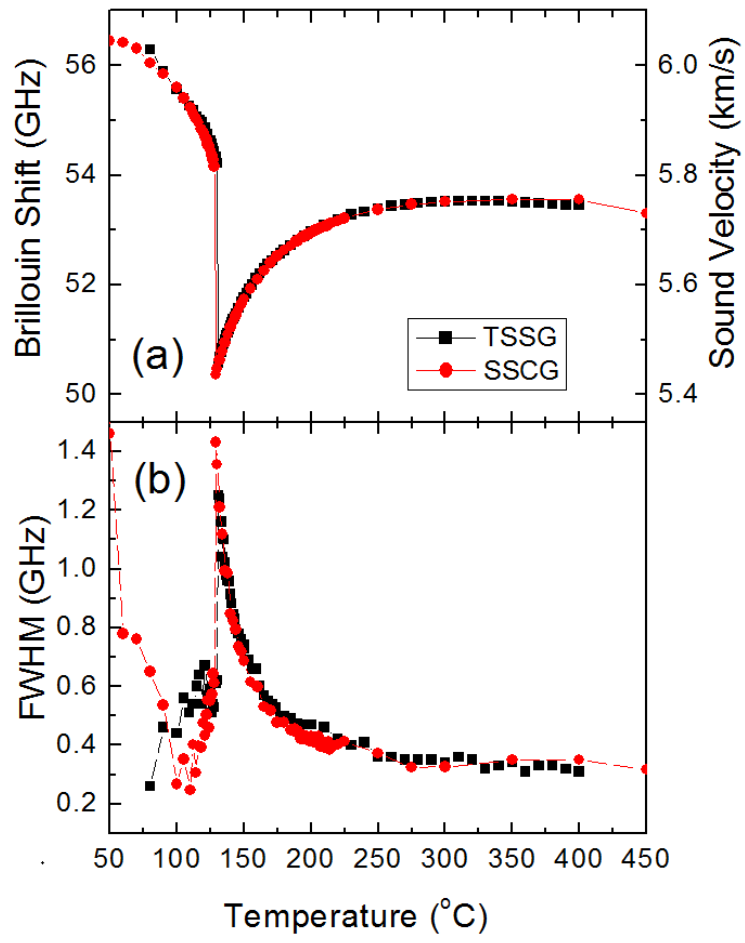

**Figure S2.** Temperature dependence of (a) the Brillouin shift of the LA mode, (b) the FWHM of the LA mode of both TSSG-grown and SSCG-grown BaTiO<sub>3</sub> single crystals. The mode frequency and the FWHM of the TSSG-grown BaTiO<sub>3</sub> were modified from the reported values in Reference 17.
